# Supplementary material for: National Patterns of Outpatient Follow-Up Visits After Emergency Care for Acute Bronchiolitis
Source: PubMed Central journal article supplement (PMC10611989; doi:10.1001/jamanetworkopen.2023.40082), 2023-10-27
Supplement: jamanetwopen-e2340082-s001.pdf [file jamanetwopen-e2340082-s001.pdf]

## Supplemental Online Content

Shapiro DJ, Bourgeois FT, Fine AM, et al. National patterns of outpatient follow-up visits after emergency care for acute bronchiolitis. *JAMA Netw Open*. 2023;6(10):e2340082. doi:10.1001/jamanetworkopen.2023.40082

### **eAppendix.** Administrative Codes

This supplemental material has been provided by the authors to give readers additional information about their work.

## eAppendix. Administrative Codes

| Variable                   | Type of Code <sup>1</sup> | Definition                                                                                                                                                                                                                                                                           |
|----------------------------|---------------------------|--------------------------------------------------------------------------------------------------------------------------------------------------------------------------------------------------------------------------------------------------------------------------------------|
| Albuterol                  | NDC, CPT, HCPCS           | Prescriptions: Albuterol, levalbuterol<br>Treatment: J7607, J7609, J7610, J7611, J7612, J7613, J7614, J7615, J7620, 94640, 94644, 94645                                                                                                                                              |
| Corticosteroids            | NDC, HCPCS                | Prescriptions: Dexamethasone, prednisone, prednisolone, methylprednisolone<br>Treatment: J7506, J7509, J7510, J8540, J1020, J1030, J1040, J1720, J2920, J2930, J3303, J0702, J3301, J3300, J3302, J1100, J1094, J2650, J1700, J1710, J2650, J7512, J1700, J1710, J3304, Q9993, C9469 |
| Antibiotics                | NDC                       | Prescriptions: Amoxicillin, amoxicillin/clavulanate, penicillin, cephalixin, cefadroxil, cefuroxime, cefpodoxime, cefixime, cefdinir, clindamycin, azithromycin, levofloxacin, trimethoprim/sulfamethoxazole                                                                         |
| Intravenous fluids         | CPT, HCPCS                | 96360, 96361, S5010, J7030, J7040, J7042, J7050, J7120, J7121                                                                                                                                                                                                                        |
| Chest radiography          | CPT                       | 71010, 71015, 71020, 71021, 71022, 71023, 71030, 71034, 71035, 71045, 71046, 71047, 71048                                                                                                                                                                                            |
| Viral testing              | CPT                       | 87807, 87280, 87420, 87631, 87632, 87633, 87798, 87636, 87637, 87426, 87811, U0001, U0002, U0003, U0004, U0005, 87426, 87635, 87811, 87275, 87276, 87279, 87280, 87400, 87420, 87501, 87502, 87503, 87631, 87634, 87804, 87807, 87428, 87636, 87637, 0240U, 0241U                    |
| Office visits <sup>2</sup> | CPT, HCPCS                | T1015, 99201-99205, 99211-99215, 99381-99385, 99391-99395                                                                                                                                                                                                                            |

1. CPT: Current Procedural Terminology; HCPCS: Healthcare Common Procedure Coding System; NDC: National Drug Code Directory; ICD-10: International Classification of Diseases, 10th Revision

2. Excludes visits to medical/pediatric/surgical subspecialists, optometry, dentistry, pharmacy, and physical therapy.
