# Supplementary material for: National Patterns of Outpatient Follow-Up Visits After Emergency Care for Acute Bronchiolitis
Source: PubMed Central journal article supplement (PMC10611989; doi:10.1001/jamanetworkopen.2023.40082), 2023-10-27
Supplement: jamanetwopen-e2340082-s002.pdf [file jamanetwopen-e2340082-s002.pdf]

## Data Sharing Statement

Shapiro. National Patterns of Outpatient Follow-Up Visits After Emergency Care for Acute Bronchiolitis. *JAMA Netw Open*. Published October 27, 2023.  
doi:10.1001/jamanetworkopen.2023.40082

### Data

**Data available:** No
